# Supplementary material for: Interpreting Meta-Analyses of Genome-Wide Association Studies
Source: PubMed Central journal article supplement (PMC3291559; doi:10.1371/journal.pgen.1002555), 2012-03-01

rs4656940

P-values only

P-M plot

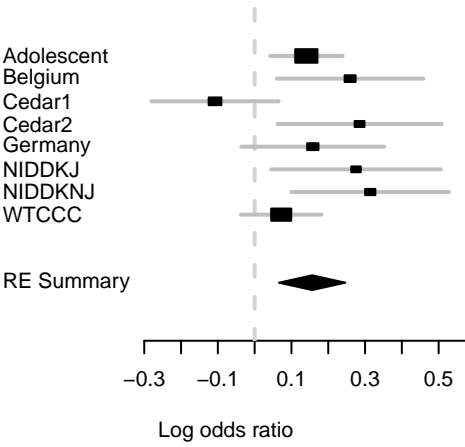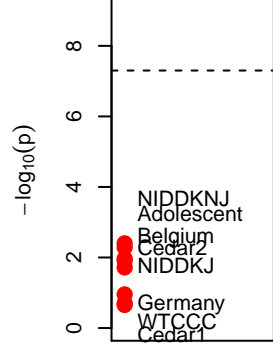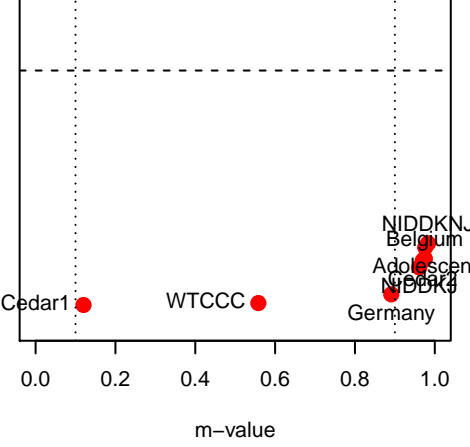

rs3024505

P-values only

P-M plot

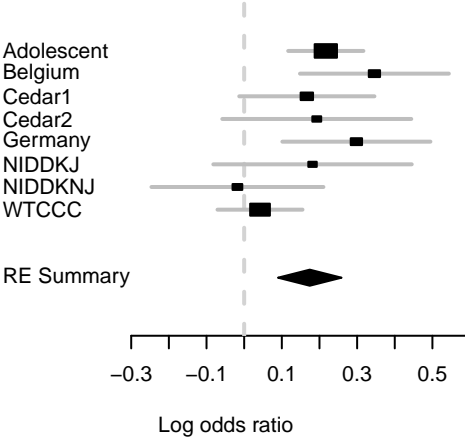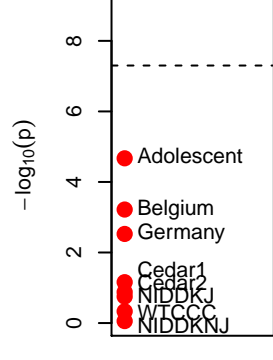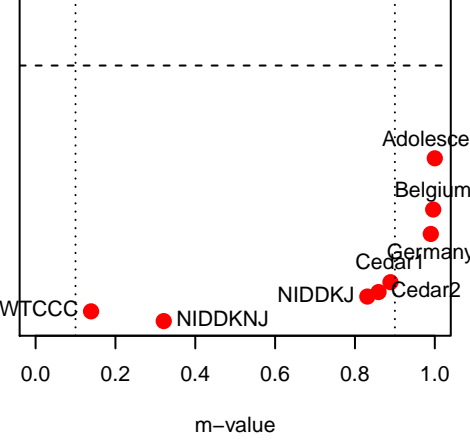

rs780093

P-values only

P-M plot

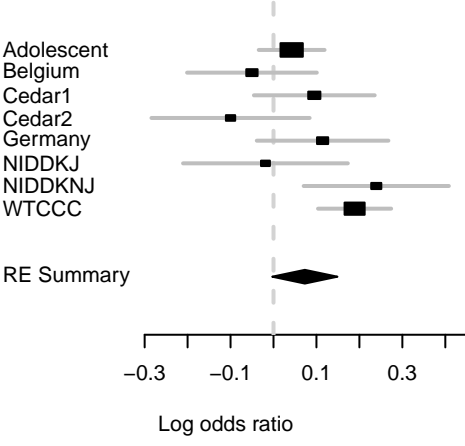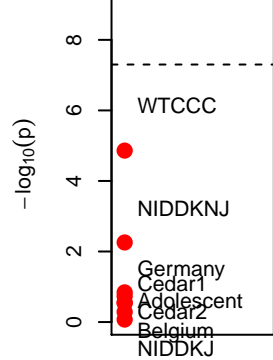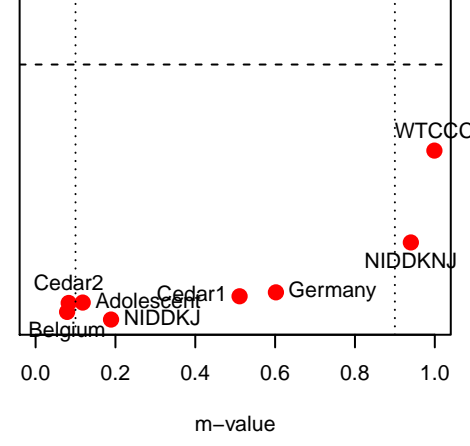

rs17309827

P-values only

P-M plot

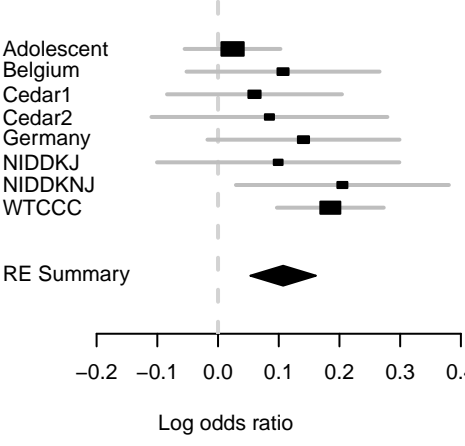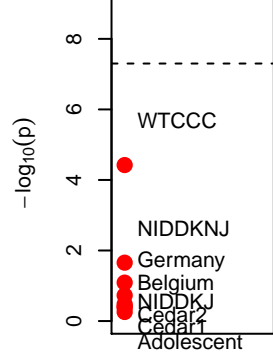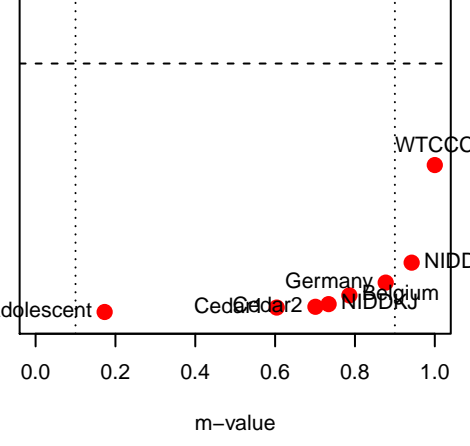

rs17293632

P-values only

P-M plot

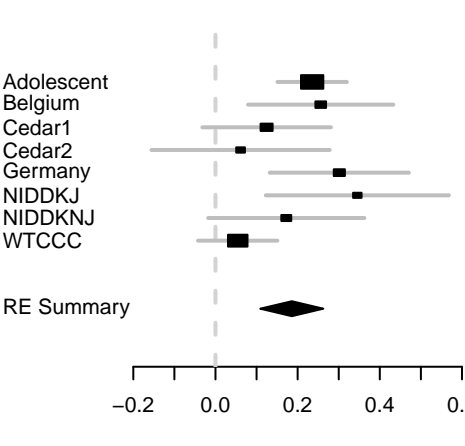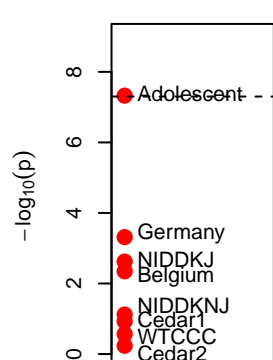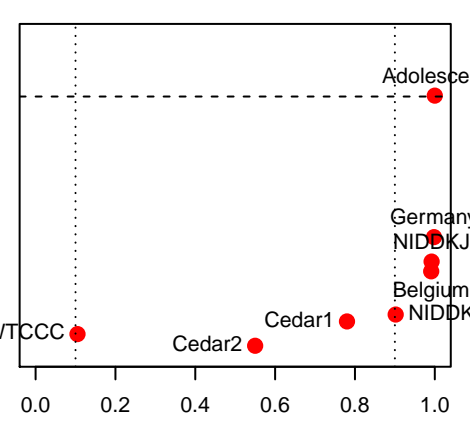

rs151181

P-values only

P-M plot

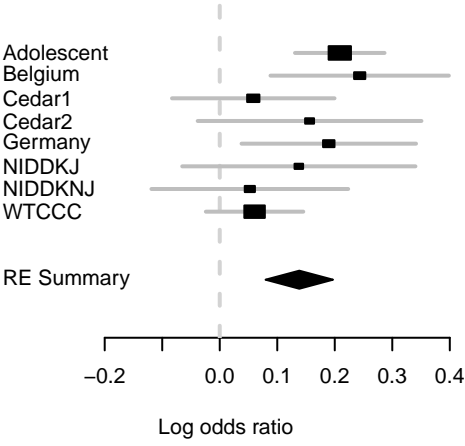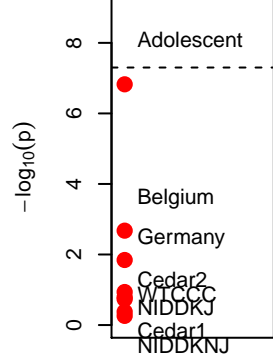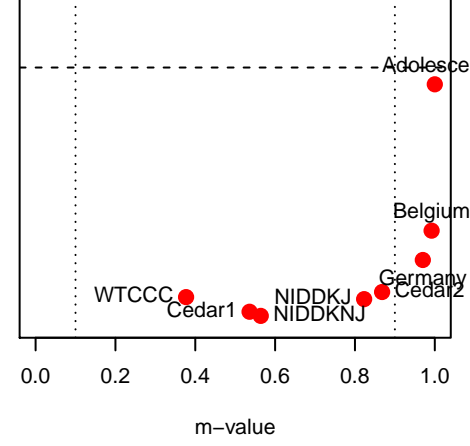

Supplement: pgen.1002555.s001.pdf [file pgen.1002555.s001.pdf]
