# Supplementary material for: Interpreting Meta-Analyses of Genome-Wide Association Studies
Source: PubMed Central journal article supplement (PMC3291559; doi:10.1371/journal.pgen.1002555), 2012-03-01

$\alpha=1, \beta=1$

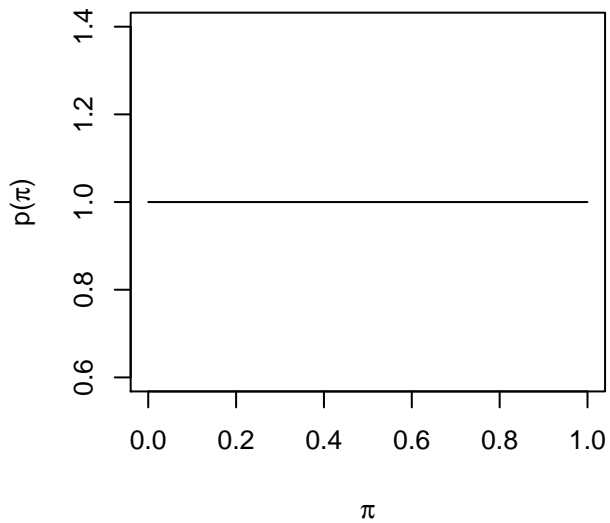

$\alpha=1.2, \beta=1$

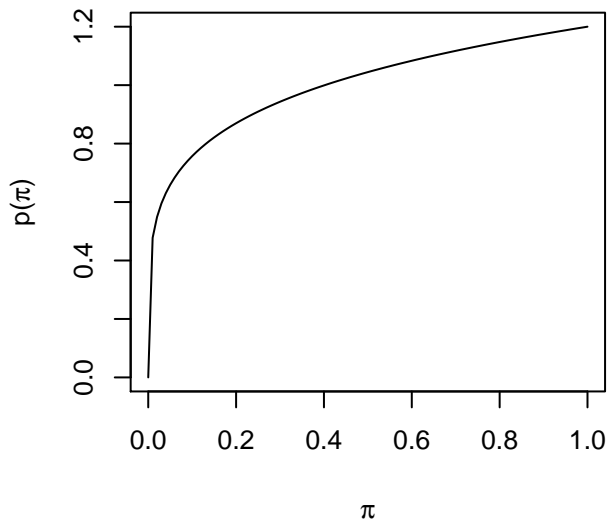

$\alpha=1.5, \beta=1$

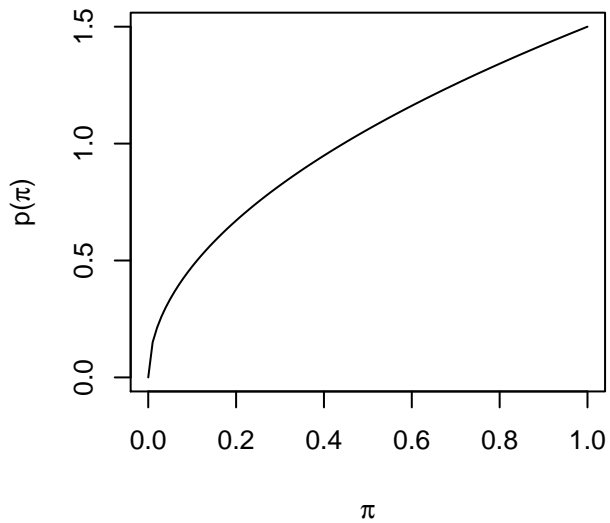

$\alpha=1.5, \beta=1.5$

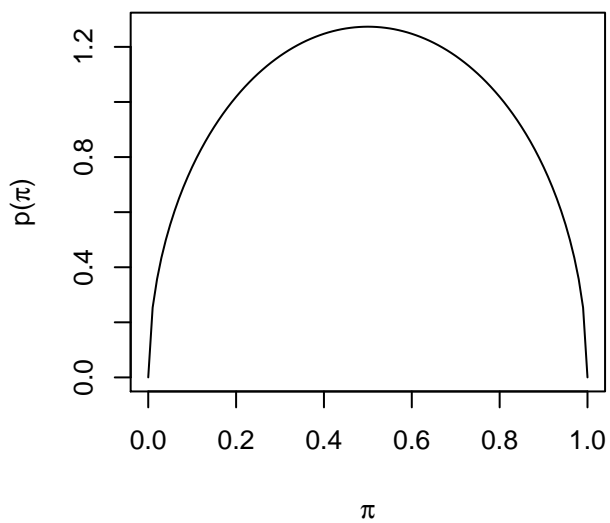

Supplement: pgen.1002555.s002.pdf [file pgen.1002555.s002.pdf]
